# Supplementary material
Source: ML conference proceedings conference paper supplement (https://openaccess.thecvf.com/content/CVPR2026/html/Asthana_SplatSuRe_Selective_Super-Resolution_CVPR_2026_paper.html)
Supplement: Supplementary file 1 [file Asthana_SplatSuRe_Selective_Super-Resolution_CVPR_2026_supplemental.pdf]

## A. Appendix

### A.1. Results for 8× Super-Resolution

Table 4 reports quantitative results at 8× super-resolution (SR) for Tanks & Temples [15]. We downsample the original  $1920 \times 1080$  images by 16× and upsample by 8× to half the native resolution. Our method achieves the best SSIM, PSNR, LPIPS, FID, and DreamSim scores. 3DGS (LR) attains higher MUSIQ and NIQE scores, consistent with the behavior discussed in Section 6. Our CMMD score ranks fourth among the compared methods. Prior work [12] shows that CMMD is sensitive to high-frequency distortions introduced by noise in the embedding space. We hypothesize that sharpening effects like mild aliasing or overly crisp edges at high upsampling factors may be interpreted as distortions by CMMD, even when they improve perceptual quality and are reflected positively by other metrics. As no single metric fully characterizes visual fidelity, we report a broad suite of metrics for a more complete evaluation.

Table 5 presents the 8× SR results for Deep Blending [8] and Mip-NeRF 360 [1]. For Deep Blending, we downsample the original images by 8× ( $\sim 125 \times 125$ ) and upsample by 8× back to the native resolution ( $\sim 1K \times 1K$ ). For Mip-NeRF 360, we downsample the original images by 16× ( $\sim 250 \times 188$ ) and upsample by 8× to half the native resolution ( $\sim 2K \times 1.5K$ ). SplatSuRe achieves the best results across all metrics on Deep Blending and nearly all metrics on Mip-NeRF 360, slightly trailing only Mip-Splatting [33] on SSIM while outperforming SRGS [6]. In these settings, the LR images contain limited high-frequency information due to their lower resolutions, requiring SR to hallucinate substantially more detail. This contrasts with the 4× setting in Section 6, where the higher-resolution inputs in Mip-NeRF 360 reduce the need for SR and favor anti-aliasing approaches such as Mip-Splatting. These results emphasize that our selective SR method yields higher image quality than uniform application, even in settings with highly generative, view-inconsistent SR.

### A.2. Unified Training Pipeline

Table 6 evaluates a unified training pipeline that merges the LR initialization and SR refinement stages to avoid the training time overhead introduced by the two-stage pipeline in Section 4. The model is trained with LR images for the first 5K iterations to obtain stable geometry, after which the Gaussian fidelity scores and SR weight maps are computed and training continues with SR supervision for the remaining 25K iterations. The total budget of 30K iterations matches that used by baseline methods using a single-stage pipeline. This unified approach achieves performance comparable to the original two-stage formulation reported in Tables 1 and 2, indicating that our SplatSuRe objective remains effective as a single continuous training schedule.

### A.3. Additional Ratio Threshold Analysis

Different scenes exhibit distinct behaviors as the ratio threshold and corresponding amount of super-resolution (SR) information increase. Most scenes benefit from a moderate amount of SR but experience a sharp drop in image quality when it is excessively applied, while others plateau or continue improving with diminishing returns. We visualize these trends by plotting PSNR and LPIPS across ratio thresholds for three representative scenes in each category.

Figure 7 illustrates scenes that benefit from an optimal amount of SR. Image quality initially improves with moderate SR but decreases sharply when it is excessively applied. Our method identifies the most poorly sampled regions and selectively applies SR to them, yielding a substantial initial quality boost. However, applying excessive SR introduces multi-view inconsistencies that rapidly degrade image quality. This behavior appears consistently across most scenes, supporting our hypothesis that selectively applying SR is more beneficial than applying it uniformly.

Figure 8 presents scenes that plateau in image quality or continue improving slightly as the amount of SR is increased. Our selective SR method produces sharp early quality gains at lower ratio thresholds, after which applying additional SR yields diminishing returns or no improvement. In particular, this occurs in scenes where the input images already contain substantial high-frequency detail and SR produces simpler sharpening or edge enhancement effects rather than hallucinating new structure, making uniform application less harmful and sometimes marginally beneficial. This behavior is especially common in outdoor scenes in Mip-NeRF 360 [1], where the downsampled  $\sim 500 \times 375$  images remain relatively high-resolution and therefore do not exhibit the multi-view inconsistencies that typically arise when excessive SR is applied.

### A.4. Additional Visualizations

Figures 9 and 10 present additional qualitative results on Tanks & Temples [15]. Consistent with the examples in Figures 1 and 5 discussed in Section 6, SplatSuRe produces sharper reconstructions than competing methods while reducing artifacts and preserving smoothness in uniformly textured regions.

### A.5. Per-Scene Metrics

Tables 7, 8, 9, 10, 11, 12, 13, and 14 report per-scene SSIM, PSNR, LPIPS, FID, CMMD, DreamSim, MUSIQ, and NIQE results on Tanks & Temples [15], Deep Blending [8], and Mip-NeRF 360 [1] for all methods evaluated in Section 5. Across individual scenes, we observe the same trends as in the averaged results presented by Tables 1 and 2 in Section 6: SplatSuRe achieves the strongest performance on Tanks & Temples and Deep Blending and outperforms SRGS on Mip-NeRF 360.

Table 4. **Quantitative results on Tanks & Temples [15] at 8× super-resolution.** Experiments are performed using ratio threshold  $\tau=1.1$ . The **best**, **second best** and **third best** entries are highlighted. Our SplatSuRe method achieves the strongest results on most metrics.

| Method                    | Tanks & Temples [15] |                 |                    |                  |                   |                       |                  |                   |
|---------------------------|----------------------|-----------------|--------------------|------------------|-------------------|-----------------------|------------------|-------------------|
|                           | SSIM $\uparrow$      | PSNR $\uparrow$ | LPIPS $\downarrow$ | FID $\downarrow$ | CMMD $\downarrow$ | DreamSim $\downarrow$ | MUSIQ $\uparrow$ | NIQE $\downarrow$ |
| 3DGS (LR) [14]            | 0.537                | 16.40           | 0.473              | 172.44           | 3.795             | 0.2427                | 46.870           | 3.976             |
| 3DGS [14] + StableSR [27] | 0.664                | 21.49           | 0.406              | 99.80            | 1.878             | 0.1100                | 38.929           | 6.293             |
| Mip-Splatting [33]        | 0.661                | 21.53           | 0.428              | 109.01           | 1.941             | 0.1183                | 32.417           | 6.645             |
| SRGS [6] + StableSR [27]  | 0.674                | 21.97           | 0.399              | 92.91            | 1.891             | 0.0981                | 38.322           | 6.138             |
| Ours + StableSR [27]      | 0.692                | 22.48           | 0.378              | 77.17            | 2.007             | 0.0774                | 44.428           | 5.341             |

Table 5. **Quantitative results on Deep Blending [8] and Mip-NeRF 360 [1] at 8× super-resolution.** Experiments are performed using ratio threshold  $\tau=1.1$ . Our SplatSuRe method achieves the strongest results on almost all metrics.

| Method                    | Deep Blending [8] |                 |                    |                   |                       | Mip-NeRF 360 [1] |                 |                    |                   |                       |
|---------------------------|-------------------|-----------------|--------------------|-------------------|-----------------------|------------------|-----------------|--------------------|-------------------|-----------------------|
|                           | SSIM $\uparrow$   | PSNR $\uparrow$ | LPIPS $\downarrow$ | CMMD $\downarrow$ | DreamSim $\downarrow$ | SSIM $\uparrow$  | PSNR $\uparrow$ | LPIPS $\downarrow$ | CMMD $\downarrow$ | DreamSim $\downarrow$ |
| 3DGS (LR) [14]            | 0.783             | 24.50           | 0.404              | 2.051             | 0.1280                | 0.509            | 18.17           | 0.491              | 2.395             | 0.1337                |
| 3DGS [14] + StableSR [27] | 0.821             | 26.68           | 0.383              | 1.159             | 0.0705                | 0.630            | 24.23           | 0.445              | 1.096             | 0.0546                |
| Mip-Splatting [33]        | 0.831             | 27.24           | 0.391              | 1.127             | 0.0689                | 0.656            | 24.80           | 0.420              | 0.610             | 0.0243                |
| SRGS [6] + StableSR [27]  | 0.830             | 27.35           | 0.377              | 1.079             | 0.0622                | 0.648            | 24.88           | 0.422              | 0.665             | 0.0320                |
| Ours + StableSR [27]      | 0.843             | 28.03           | 0.357              | 0.879             | 0.0489                | 0.655            | 25.08           | 0.406              | 0.546             | 0.0231                |

Table 6. **Quantitative comparison of our unified and two-stage pipelines at 4× SR across Tanks & Temples [15], Deep Blending [8], and Mip-NeRF 360 [1].** Experiments are performed using ratio threshold  $\tau = 1.1$ . The best entry is **bolded**. The unified pipeline achieves similar performance to the two-stage approach while requiring less training time.

| Dataset              | Method    | SSIM $\uparrow$ | PSNR $\uparrow$ | LPIPS $\downarrow$ | FID $\downarrow$ | CMMD $\downarrow$ | DreamSim $\downarrow$ | MUSIQ $\uparrow$ | NIQE $\downarrow$ |
|----------------------|-----------|-----------------|-----------------|--------------------|------------------|-------------------|-----------------------|------------------|-------------------|
| Tanks & Temples [15] | Two-Stage | <b>0.784</b>    | <b>23.81</b>    | 0.272              | 37.72            | 1.040             | 0.0413                | 58.332           | 3.928             |
|                      | Unified   | 0.781           | 23.70           | <b>0.271</b>       | <b>36.02</b>     | <b>1.006</b>      | <b>0.0400</b>         | <b>59.701</b>    | <b>3.705</b>      |
| Deep Blending [8]    | Two-Stage | <b>0.872</b>    | <b>29.01</b>    | 0.306              | 44.14            | 0.496             | 0.0330                | <b>53.019</b>    | 5.411             |
|                      | Unified   | 0.871           | 28.96           | <b>0.304</b>       | <b>41.70</b>     | <b>0.483</b>      | <b>0.0326</b>         | 52.983           | <b>5.286</b>      |
| Mip-NeRF 360 [1]     | Two-Stage | 0.740           | 26.34           | 0.323              | <b>27.56</b>     | 0.339             | 0.0179                | 54.366           | 3.934             |
|                      | Unified   | <b>0.758</b>    | <b>26.69</b>    | <b>0.304</b>       | 26.18            | <b>0.271</b>      | <b>0.0164</b>         | <b>56.773</b>    | <b>3.715</b>      |

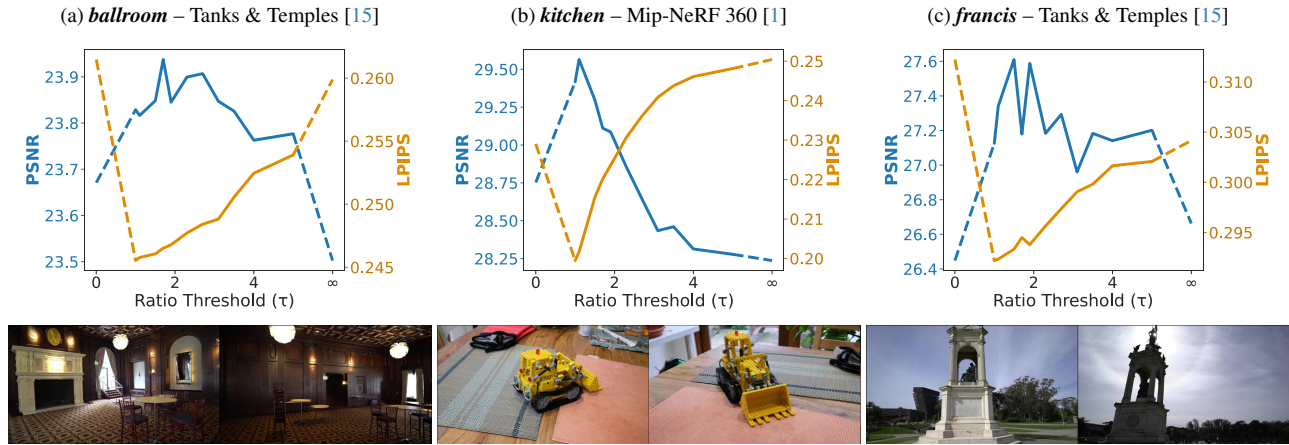

Figure 7. **Representative scenes that benefit from an optimal amount of super-resolution.** Top: Image quality vs. ratio threshold plots. Bottom: ground truth images illustrating scene structure for (a) *ballroom* from Tanks & Temples [15], (b) *kitchen* from Mip-NeRF 360 [1] and (c) *francis* from Tanks & Temples. Applying SR to the most poorly sampled regions yields large gains in image quality, whereas excessive SR introduces multi-view inconsistencies that sharply degrade quality. Most scenes exhibit this behavior, supporting our hypothesis that selectively applying SR is more beneficial than applying it uniformly.

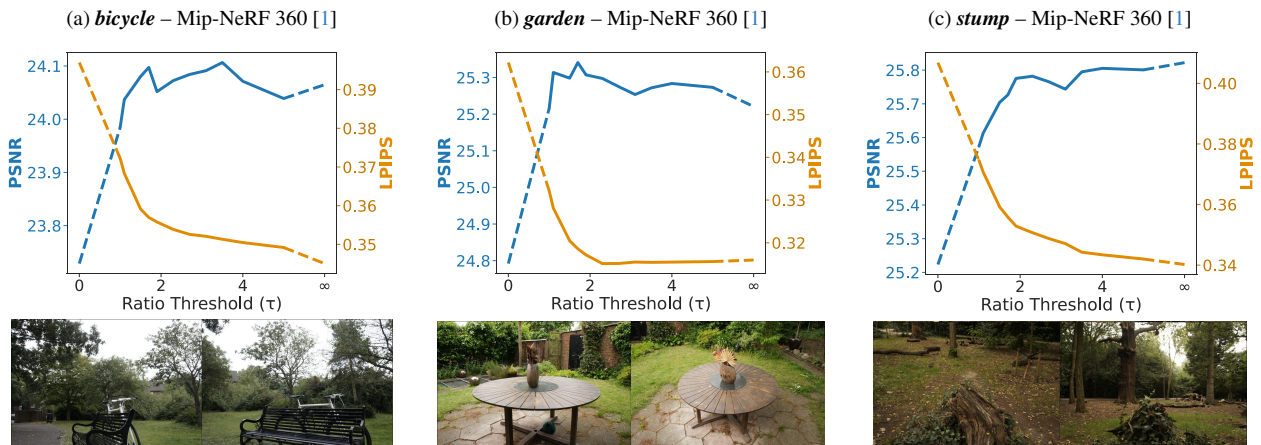

Figure 8. **Representative scenes that plateau in image quality or continue to benefit from increased amounts of super-resolution.** Top: Image quality vs. ratio threshold plots. Bottom: ground truth images illustrating scene structure for (a) *bicycle*, (b) *garden*, and (c) *stump* from Mip-NeRF 360 [1]. Applying SR to the most poorly sampled regions yields large gains in image quality, while further increasing SR yields diminishing returns or no improvement. In particular, this occurs in scenes where the input images already contain substantial high-frequency detail and SR produces simpler sharpening or edge-enhancement effects rather than hallucinating new structure, making uniform application less harmful and sometimes marginally beneficial.

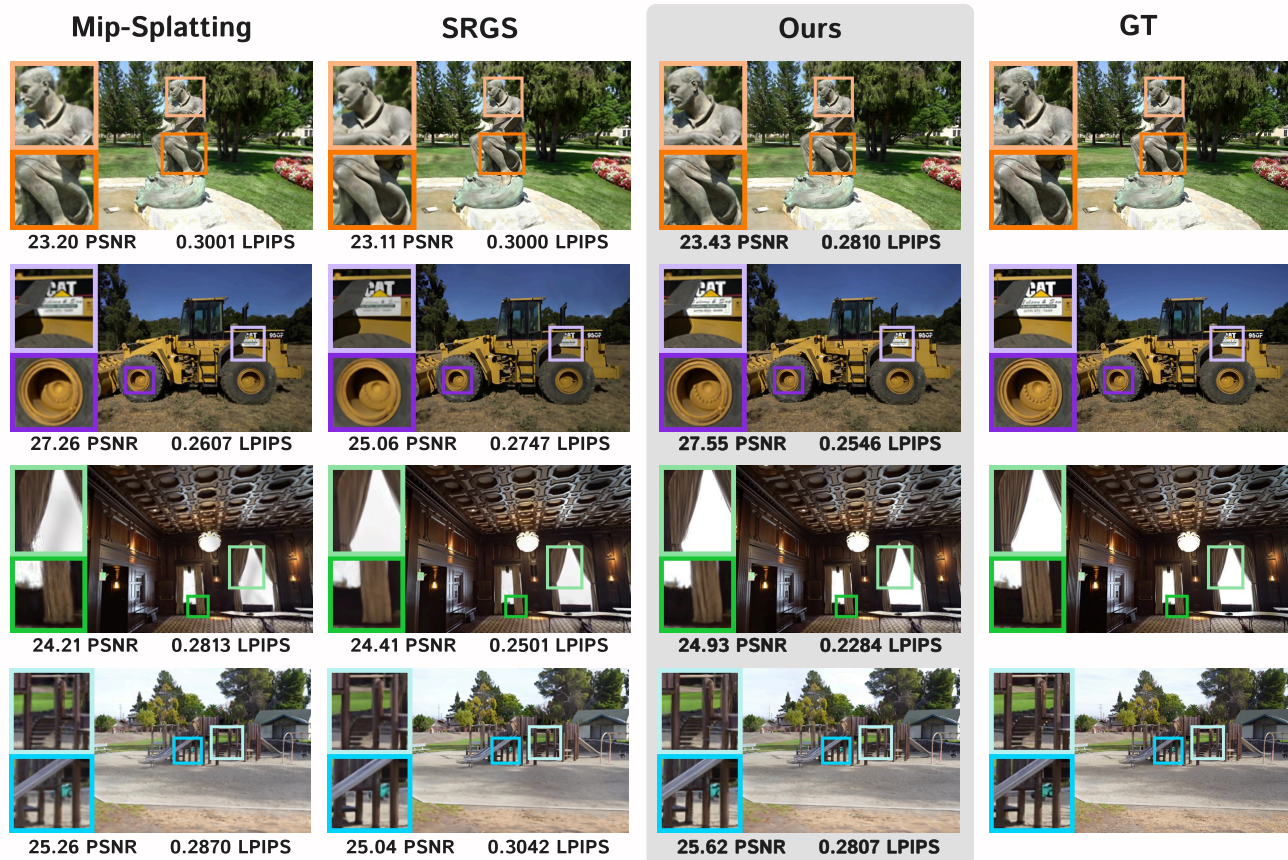

Figure 9. **Additional qualitative results on Tanks & Temples [15]**. Experiments are performed at  $4\times$  super-resolution with ratio threshold  $\tau=1.1$ . Compared to Mip-Splatting [33] and SRGS [6], our method produces sharper, more faithful reconstructions that better align with ground truth while maintaining cross-view consistency. It preserves high-frequency patterns (orange boxes on statue), fine details in text (purple box on vehicle), and reduces artifacts while preserving sharpness (green boxes on curtains, blue boxes in playground).

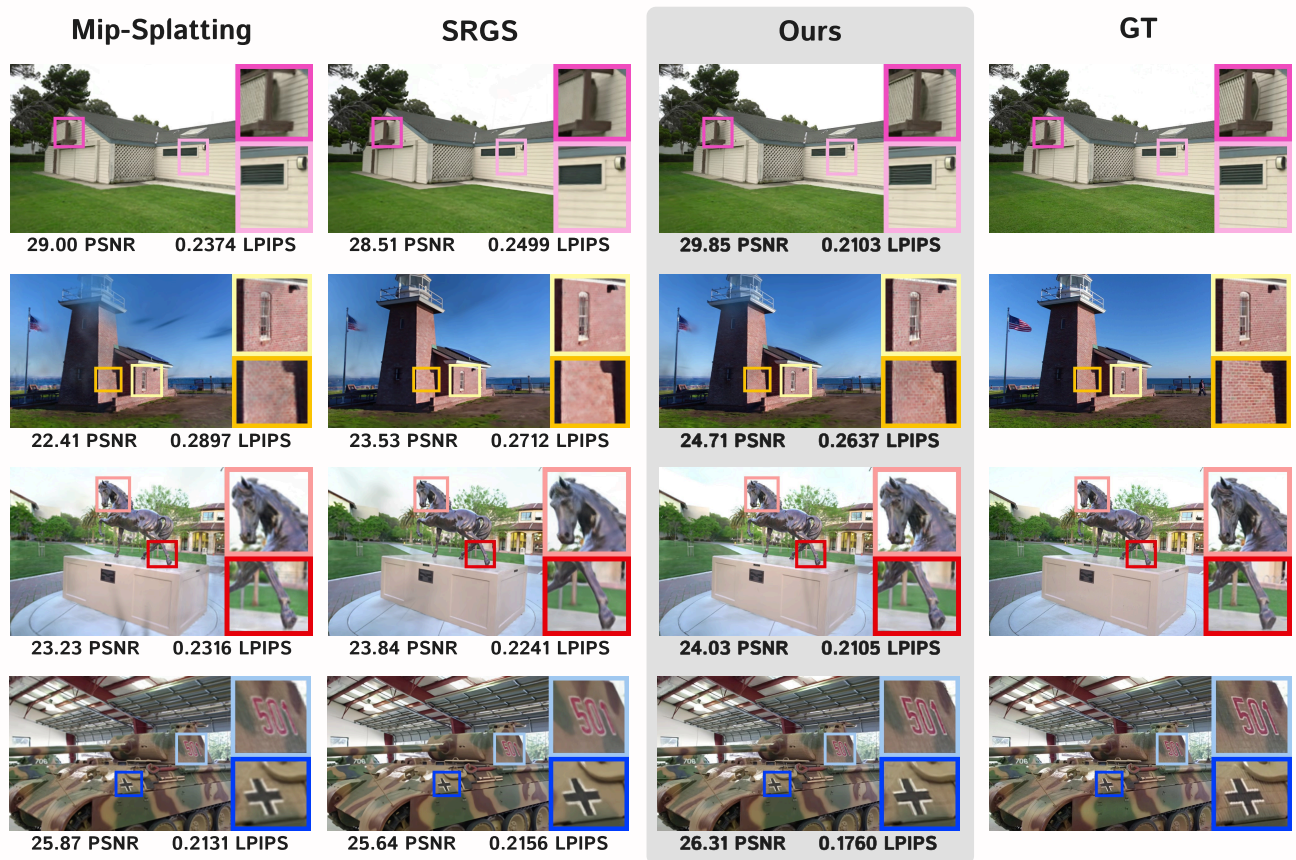

Figure 10. **Additional qualitative results on Tanks & Temples [15].** Experiments are performed at  $4\times$  super-resolution with ratio threshold  $\tau=1.1$ . Compared to Mip-Splatting [33] and SRGS [6], our method produces sharper, more faithful reconstructions that better align with the ground truth while maintaining cross-view consistency. It preserves high-frequency geometry (pink boxes on barn) and retains sharp texture (yellow boxes on lighthouse, red boxes on horse statue, blue boxes on tank).

Table 7. SSIM  $\uparrow$  on each scene in Tanks & Temples [15], Deep Blending [8], and Mip-NeRF 360 [1]. Experiments are performed at  $4\times$  super-resolution using ratio threshold  $\tau=1.1$ . The best, second best and third best entries are highlighted.

| Method                    | Tanks & Temples [15] |              |              |              |              |              |              |              |              |              |              |              |              |              |              |              |              |              |              |
|---------------------------|----------------------|--------------|--------------|--------------|--------------|--------------|--------------|--------------|--------------|--------------|--------------|--------------|--------------|--------------|--------------|--------------|--------------|--------------|--------------|
|                           | auditorium           | ignatius     | palace       | ballroom     | panther      | barn         | lighthouse   | playground   | courtroom    | m60          | temple       | caterpillar  | family       | train        | francis      | truck        | church       | horse        | museum       |
| 3DGS (LR) [14]            | 0.807                | 0.527        | 0.666        | 0.578        | 0.752        | 0.729        | 0.742        | 0.628        | 0.647        | 0.735        | 0.715        | 0.602        | 0.566        | 0.648        | 0.779        | 0.649        | 0.682        | 0.675        | 0.579        |
| 3DGS [14] + StableSR [27] | <b>0.849</b>         | 0.646        | <b>0.709</b> | 0.702        | 0.819        | 0.771        | 0.777        | 0.720        | 0.725        | 0.810        | 0.761        | 0.686        | 0.753        | 0.705        | 0.845        | 0.759        | 0.744        | 0.811        | 0.683        |
| Mip-Splatting [33]        | 0.838                | <b>0.681</b> | 0.687        | <b>0.729</b> | <b>0.847</b> | 0.790        | 0.789        | <b>0.746</b> | 0.730        | <b>0.836</b> | <b>0.762</b> | <b>0.704</b> | <b>0.788</b> | <b>0.733</b> | <b>0.855</b> | <b>0.786</b> | <b>0.753</b> | <b>0.827</b> | <b>0.689</b> |
| SRGS [6] + StableSR [27]  | <b>0.861</b>         | 0.671        | 0.713        | <b>0.734</b> | 0.846        | 0.794        | 0.789        | 0.742        | 0.746        | 0.835        | 0.773        | 0.703        | 0.780        | 0.729        | 0.857        | <b>0.784</b> | 0.761        | 0.829        | 0.704        |
| Ours + StableSR [27]      | 0.859                | <b>0.694</b> | <b>0.717</b> | <b>0.746</b> | <b>0.859</b> | <b>0.808</b> | <b>0.807</b> | <b>0.764</b> | <b>0.752</b> | <b>0.846</b> | <b>0.786</b> | <b>0.714</b> | <b>0.795</b> | <b>0.743</b> | <b>0.866</b> | <b>0.798</b> | <b>0.781</b> | <b>0.835</b> | <b>0.716</b> |

  

| Method                    | Deep Blending [8] |              |              |              | Mip-NeRF 360 [1] |              |              |              |              |              |              |  |
|---------------------------|-------------------|--------------|--------------|--------------|------------------|--------------|--------------|--------------|--------------|--------------|--------------|--|
|                           | drjohnson         | playroom     | bicycle      | bonsai       | counter          | flowers      | garden       | kitchen      | room         | stump        | treehill     |  |
| 3DGS (LR) [14]            | 0.828             | 0.843        | 0.527        | 0.776        | 0.772            | 0.429        | 0.559        | 0.719        | 0.836        | 0.581        | 0.516        |  |
| 3DGS [14] + StableSR [27] | 0.837             | 0.854        | 0.604        | 0.848        | 0.833            | 0.497        | 0.654        | 0.751        | 0.858        | 0.669        | 0.571        |  |
| Mip-Splatting [33]        | <b>0.855</b>      | <b>0.874</b> | <b>0.676</b> | <b>0.917</b> | <b>0.872</b>     | <b>0.544</b> | <b>0.719</b> | <b>0.870</b> | <b>0.897</b> | <b>0.740</b> | <b>0.596</b> |  |
| SRGS [6] + StableSR [27]  | 0.851             | 0.870        | 0.653        | 0.896        | 0.863            | 0.533        | 0.692        | 0.825        | 0.888        | 0.671        | 0.590        |  |
| Ours + StableSR [27]      | <b>0.867</b>      | <b>0.877</b> | 0.646        | 0.906        | 0.867            | 0.503        | 0.690        | 0.869        | 0.896        | 0.706        | 0.582        |  |

Table 8. PSNR  $\uparrow$  on each scene in Tanks & Temples [15], Deep Blending [8], and Mip-NeRF 360 [1].

| Method                    | Tanks & Temples [15] |              |              |              |              |              |              |              |              |              |              |              |              |              |              |              |              |              |              |
|---------------------------|----------------------|--------------|--------------|--------------|--------------|--------------|--------------|--------------|--------------|--------------|--------------|--------------|--------------|--------------|--------------|--------------|--------------|--------------|--------------|
|                           | auditorium           | ignatius     | palace       | ballroom     | panther      | barn         | lighthouse   | playground   | courtroom    | m60          | temple       | caterpillar  | family       | train        | francis      | truck        | church       | horse        | museum       |
| 3DGS (LR) [14]            | 22.14                | 17.13        | 18.35        | 18.23        | 22.49        | 22.97        | 20.47        | 19.85        | 19.53        | 21.72        | 18.99        | 19.36        | 15.09        | 18.80        | 22.47        | 17.38        | 20.00        | 16.30        | 17.44        |
| 3DGS [14] + StableSR [27] | <b>23.62</b>         | 20.52        | <b>19.68</b> | <b>22.20</b> | 25.23        | 25.18        | <b>21.65</b> | 23.24        | 21.75        | 24.72        | 20.24        | 22.44        | 22.54        | 20.55        | 25.97        | <b>22.86</b> | <b>22.02</b> | <b>22.72</b> | 19.76        |
| Mip-Splatting [33]        | 23.46                | <b>21.22</b> | 18.24        | <b>23.15</b> | <b>27.11</b> | <b>26.85</b> | 21.29        | <b>24.13</b> | <b>22.26</b> | 26.16        | <b>20.31</b> | <b>22.99</b> | <b>24.09</b> | <b>21.33</b> | <b>26.62</b> | <b>23.94</b> | <b>21.99</b> | <b>23.48</b> | <b>20.28</b> |
| SRGS [6] + StableSR [27]  | <b>24.23</b>         | <b>21.26</b> | 19.69        | <b>23.44</b> | <b>26.98</b> | <b>26.83</b> | 21.74        | <b>24.12</b> | <b>22.74</b> | <b>26.17</b> | <b>20.49</b> | <b>22.98</b> | <b>23.82</b> | <b>21.28</b> | <b>26.55</b> | <b>23.87</b> | <b>22.54</b> | <b>23.72</b> | <b>20.63</b> |
| Ours + StableSR [27]      | <b>24.66</b>         | <b>21.61</b> | <b>20.24</b> | <b>23.82</b> | <b>27.38</b> | <b>27.33</b> | <b>22.82</b> | <b>25.12</b> | <b>22.99</b> | <b>26.63</b> | <b>21.39</b> | <b>23.34</b> | <b>24.00</b> | <b>21.79</b> | <b>27.34</b> | <b>24.11</b> | <b>23.18</b> | <b>23.94</b> | <b>20.77</b> |

  

| Method                    | Deep Blending [8] |              |              |              | Mip-NeRF 360 [1] |              |              |              |              |              |              |  |
|---------------------------|-------------------|--------------|--------------|--------------|------------------|--------------|--------------|--------------|--------------|--------------|--------------|--|
|                           | drjohnson         | playroom     | bicycle      | bonsai       | counter          | flowers      | garden       | kitchen      | room         | stump        | treehill     |  |
| 3DGS (LR) [14]            | 26.29             | 27.15        | 18.50        | 22.75        | 23.27            | 17.60        | 18.64        | 19.55        | 25.93        | 20.34        | 19.44        |  |
| 3DGS [14] + StableSR [27] | 26.60             | 27.71        | 22.87        | 26.48        | 26.44            | 19.92        | 23.80        | 24.80        | 28.32        | 24.24        | 21.64        |  |
| Mip-Splatting [33]        | <b>27.54</b>      | <b>29.33</b> | <b>24.28</b> | <b>30.65</b> | <b>28.28</b>     | <b>21.05</b> | <b>25.63</b> | <b>29.48</b> | <b>30.69</b> | <b>26.20</b> | <b>22.08</b> |  |
| SRGS [6] + StableSR [27]  | 27.38             | 29.08        | 24.05        | 29.81        | 28.11            | 20.91        | 25.20        | 28.26        | 30.42        | 24.58        | 21.97        |  |
| Ours + StableSR [27]      | <b>28.46</b>      | <b>29.57</b> | 24.04        | 30.54        | <b>28.39</b>     | 20.55        | 25.31        | <b>29.56</b> | <b>31.05</b> | 25.61        | 22.02        |  |

Table 9. LPIPS  $\downarrow$  on each scene in Tanks & Temples [15], Deep Blending [8], and Mip-NeRF 360 [1].

| Method                    | Tanks & Temples [15] |              |              |              |              |              |              |              |              |              |              |             |              |              |              |              |              |              |              |
|---------------------------|----------------------|--------------|--------------|--------------|--------------|--------------|--------------|--------------|--------------|--------------|--------------|-------------|--------------|--------------|--------------|--------------|--------------|--------------|--------------|
|                           | auditorium           | ignatius     | palace       | ballroom     | panther      | barn         | lighthouse   | playground   | courtroom    | m60          | temple       | caterpillar | family       | train        | francis      | truck        | church       | horse        | museum       |
| 3DGS (LR) [14]            | 0.301                | 0.411        | 0.380        | 0.337        | 0.309        | 0.317        | 0.303        | 0.371        | 0.376        | 0.302        | 0.335        | 0.385       | 0.408        | 0.346        | 0.352        | 0.345        | 0.343        | 0.322        | 0.400        |
| 3DGS [14] + StableSR [27] | <b>0.247</b>         | 0.357        | <b>0.364</b> | <b>0.283</b> | 0.275        | 0.295        | <b>0.283</b> | 0.333        | 0.294        | 0.266        | <b>0.302</b> | 0.340       | 0.289        | 0.305        | 0.316        | 0.298        | <b>0.306</b> | <b>0.234</b> | <b>0.317</b> |
| Mip-Splatting [33]        | 0.275                | 0.331        | 0.408        | 0.288        | 0.260        | 0.293        | 0.296        | 0.316        | 0.323        | 0.250        | 0.325        | 0.325       | 0.281        | 0.298        | 0.316        | <b>0.284</b> | 0.313        | 0.237        | 0.345        |
| SRGS [6] + StableSR [27]  | <b>0.242</b>         | 0.328        | 0.367        | <b>0.266</b> | 0.251        | 0.277        | 0.276        | 0.311        | 0.292        | 0.242        | 0.299        | 0.321       | 0.271        | 0.289        | 0.304        | 0.274        | 0.294        | 0.221        | 0.315        |
| Ours + StableSR [27]      | 0.248                | <b>0.310</b> | <b>0.355</b> | <b>0.246</b> | <b>0.228</b> | <b>0.262</b> | <b>0.259</b> | <b>0.284</b> | <b>0.285</b> | <b>0.225</b> | <b>0.290</b> | 0.313       | <b>0.257</b> | <b>0.281</b> | <b>0.292</b> | <b>0.253</b> | <b>0.272</b> | <b>0.211</b> | <b>0.300</b> |

  

| Method                    | Deep Blending [8] |              |              |              | Mip-NeRF 360 [1] |              |              |              |              |              |              |  |
|---------------------------|-------------------|--------------|--------------|--------------|------------------|--------------|--------------|--------------|--------------|--------------|--------------|--|
|                           | drjohnson         | playroom     | bicycle      | bonsai       | counter          | flowers      | garden       | kitchen      | room         | stump        | treehill     |  |
| 3DGS (LR) [14]            | 0.332             | 0.339        | 0.424        | 0.328        | 0.306            | 0.477        | 0.400        | 0.312        | 0.293        | 0.436        | 0.482        |  |
| 3DGS [14] + StableSR [27] | 0.315             | 0.335        | 0.407        | 0.256        | 0.258            | 0.461        | 0.356        | 0.301        | 0.267        | 0.394        | 0.460        |  |
| Mip-Splatting [33]        | 0.334             | <b>0.321</b> | <b>0.318</b> | <b>0.212</b> | 0.242            | <b>0.397</b> | <b>0.292</b> | <b>0.205</b> | <b>0.245</b> | <b>0.314</b> | <b>0.403</b> |  |
| SRGS [6] + StableSR [27]  | 0.311             | 0.323        | 0.349        | <b>0.232</b> | <b>0.239</b>     | 0.420        | 0.315        | 0.249        | 0.250        | 0.368        | 0.428        |  |
| Ours + StableSR [27]      | <b>0.300</b>      | <b>0.312</b> | 0.368        | <b>0.238</b> | 0.241            | 0.454        | 0.328        | <b>0.202</b> | <b>0.253</b> | 0.371        | 0.452        |  |

Table 10. FID  $\downarrow$  on each scene in Tanks & Temples [15], Deep Blending [8], and Mip-NeRF 360 [1].

| Method                    | Tanks & Temples [15] |              |              |              |              |              |              |              |              |              |              |              |              |              |              |              |              |              |              |
|---------------------------|----------------------|--------------|--------------|--------------|--------------|--------------|--------------|--------------|--------------|--------------|--------------|--------------|--------------|--------------|--------------|--------------|--------------|--------------|--------------|
|                           | auditorium           | ignatius     | palace       | ballroom     | panther      | barn         | lighthouse   | playground   | courtroom    | m60          | temple       | caterpillar  | family       | train        | francis      | truck        | church       | horse        | museum       |
| 3DGS (LR) [14]            | 86.75                | 85.58        | <b>83.25</b> | 73.89        | 40.93        | 40.48        | 84.46        | 82.51        | 99.19        | 53.16        | 81.79        | 29.93        | 113.45       | 43.80        | 29.64        | 35.69        | 58.24        | 148.48       | 88.82        |
| 3DGS [14] + StableSR [27] | <b>68.24</b>         | 114.03       | <b>83.65</b> | 49.37        | 38.50        | 48.11        | 72.12        | 66.81        | 64.95        | 40.68        | <b>78.22</b> | 25.98        | 68.88        | 35.61        | 31.14        | 32.99        | 54.69        | 97.74        | <b>54.73</b> |
| Mip-Splatting [33]        | 78.68                | <b>52.74</b> | 138.29       | <b>40.43</b> | <b>24.78</b> | <b>36.49</b> | <b>67.71</b> | <b>59.20</b> | 69.94        | <b>25.38</b> | <b>82.25</b> | <b>20.50</b> | <b>38.03</b> | <b>30.99</b> | <b>20.36</b> | <b>20.20</b> | 48.50        | 81.54        | 60.69        |
| SRGS [6] + StableSR [27]  | <b>58.94</b>         | 79.04        | 97.00        | <b>37.35</b> | 26.97        | 36.74        | 66.75        | <b>54.86</b> | <b>59.58</b> | <b>27.03</b> | <b>75.46</b> | <b>20.10</b> | <b>43.93</b> | <b>29.88</b> | <b>23.64</b> | <b>22.37</b> | <b>45.17</b> | <b>77.02</b> | <b>51.28</b> |
| Ours + StableSR [27]      | 60.48                | <b>46.33</b> | <b>70.53</b> | <b>27.26</b> | <b>20.96</b> | <b>27.20</b> | <b>57.93</b> | <b>35.69</b> | <b>54.34</b> | <b>19.79</b> | <b>63.87</b> | <b>16.42</b> | <b>28.28</b> | <b>22.83</b> | <b>16.72</b> | <b>14.82</b> | <b>32.61</b> | <b>58.61</b> | <b>41.93</b> |

  

| Method                    | Deep Blending [8] |              |              |              | Mip-NeRF 360 [1] |              |             |              |              |              |              |  |
|---------------------------|-------------------|--------------|--------------|--------------|------------------|--------------|-------------|--------------|--------------|--------------|--------------|--|
|                           | drjohnson         | playroom     | bicycle      | bonsai       | counter          | flowers      | garden      | kitchen      | room         | stump        | treehill     |  |
| 3DGS (LR) [14]            | 60.62             | 72.04        | 30.50        | 72.93        | 79.04            | 77.01        | 47.98       | 59.89        | 41.92        | 89.83        | 42.08        |  |
| 3DGS [14] + StableSR [27] | 51.64             | 67.41        | 23.55        | 54.42        | 64.89            | 73.04        | 19.38       | 49.64        | 37.09        | 105.27       | 40.16        |  |
| Mip-Splatting [33]        | 53.90             | <b>50.26</b> | <b>10.21</b> | <b>20.19</b> | <b>36.29</b>     | <b>22.76</b> | <b>9.05</b> | <b>12.04</b> | <b>17.57</b> | <b>37.03</b> | <b>20.21</b> |  |
| SRGS [6] + StableSR [27]  | 47.05             | 51.10        | 11.37        | 26.41        | 41.87            | 46.01        | 10.46       | 15.43        | 21.62        | 42.73        | 26.52        |  |
| Ours + StableSR [27]      | <b>43.19</b>      | <b>45.09</b> | 11.79        | 22.40        | <b>38.03</b>     | <b>58.56</b> | 10.63       | <b>8.47</b>  | <b>17.69</b> | 50.63        | 29.83        |  |

Table 11. CMMD ↓ on each scene in Tanks & Temples [15], Deep Blending [8], and Mip-NeRF 360 [1].

| Method                    | Tanks & Temples [15] |          |        |          |         |       |            |            |           |       |        |             |        |       |         |       |        |       |        |
|---------------------------|----------------------|----------|--------|----------|---------|-------|------------|------------|-----------|-------|--------|-------------|--------|-------|---------|-------|--------|-------|--------|
|                           | auditorium           | ignatius | palace | ballroom | panther | barn  | lighthouse | playground | courtroom | m60   | temple | caterpillar | family | train | francis | truck | church | horse | museum |
| 3DGS (LR) [14]            | 1.770                | 2.234    | 2.361  | 1.602    | 0.718   | 1.699 | 1.540      | 1.925      | 1.616     | 1.202 | 2.522  | 1.897       | 3.038  | 2.153 | 2.758   | 2.140 | 1.705  | 3.211 | 2.165  |
| 3DGS [14] + StableSR [27] | 1.093                | 1.032    | 1.491  | 1.073    | 0.791   | 1.068 | 1.092      | 1.139      | 0.987     | 0.907 | 1.597  | 1.464       | 0.647  | 1.330 | 1.401   | 1.143 | 1.163  | 0.779 | 1.142  |
| Mip-Splatting [33]        | 1.246                | 1.046    | 1.624  | 0.787    | 0.633   | 1.140 | 0.994      | 1.151      | 1.024     | 0.579 | 1.853  | 1.243       | 0.863  | 1.384 | 1.286   | 1.080 | 1.029  | 1.105 | 1.528  |
| SRGS [6] + StableSR [27]  | 1.066                | 0.931    | 1.582  | 0.787    | 0.516   | 0.942 | 0.978      | 0.998      | 0.943     | 0.523 | 1.795  | 1.261       | 0.557  | 1.383 | 1.408   | 1.140 | 1.049  | 0.658 | 1.400  |
| Ours + StableSR [27]      | 0.993                | 1.121    | 1.568  | 0.643    | 0.351   | 1.134 | 0.901      | 1.025      | 0.951     | 0.443 | 1.699  | 1.330       | 0.521  | 1.529 | 1.355   | 1.061 | 0.944  | 0.897 | 1.286  |

  

| Method                    | Mip-NeRF 360 [1] |          |         |        |         |         |        |         |       |       |          |
|---------------------------|------------------|----------|---------|--------|---------|---------|--------|---------|-------|-------|----------|
|                           | drjohnson        | playroom | bicycle | bonsai | counter | flowers | garden | kitchen | room  | stump | treehill |
| 3DGS (LR) [14]            | 1.003            | 0.733    | 0.392   | 1.011  | 0.319   | 1.354   | 0.242  | 0.346   | 0.261 | 0.926 | 0.956    |
| 3DGS [14] + StableSR [27] | 0.807            | 0.714    | 0.621   | 0.934  | 0.440   | 1.409   | 0.310  | 0.441   | 0.578 | 0.767 | 1.023    |
| Mip-Splatting [33]        | 0.828            | 0.552    | 0.099   | 0.346  | 0.195   | 0.215   | 0.036  | 0.191   | 0.187 | 0.125 | 0.257    |
| SRGS [6] + StableSR [27]  | 0.715            | 0.546    | 0.138   | 0.417  | 0.279   | 0.782   | 0.081  | 0.228   | 0.378 | 0.261 | 0.486    |
| Ours + StableSR [27]      | 0.558            | 0.434    | 0.159   | 0.266  | 0.139   | 1.108   | 0.065  | 0.119   | 0.184 | 0.406 | 0.610    |

Table 12. DreamSim ↓ on each scene in Tanks & Temples [15], Deep Blending [8], and Mip-NeRF 360 [1].

| Method                    | Tanks & Temples [15] |          |        |          |         |        |            |            |           |        |        |             |        |        |         |        |        |        |        |
|---------------------------|----------------------|----------|--------|----------|---------|--------|------------|------------|-----------|--------|--------|-------------|--------|--------|---------|--------|--------|--------|--------|
|                           | auditorium           | ignatius | palace | ballroom | panther | barn   | lighthouse | playground | courtroom | m60    | temple | caterpillar | family | train  | francis | truck  | church | horse  | museum |
| 3DGS (LR) [14]            | 0.0969               | 0.0884   | 0.1548 | 0.0881   | 0.0399  | 0.0549 | 0.1154     | 0.0806     | 0.1074    | 0.0552 | 0.1156 | 0.0595      | 0.1215 | 0.0747 | 0.0710  | 0.0620 | 0.0795 | 0.1142 | 0.1207 |
| 3DGS [14] + StableSR [27] | 0.0634               | 0.0703   | 0.1497 | 0.0438   | 0.0443  | 0.0613 | 0.0909     | 0.0759     | 0.0566    | 0.0591 | 0.0955 | 0.0516      | 0.0565 | 0.0652 | 0.0555  | 0.0590 | 0.0558 | 0.0505 | 0.0627 |
| Mip-Splatting [33]        | 0.0739               | 0.0465   | 0.2459 | 0.0312   | 0.0216  | 0.0392 | 0.0887     | 0.0541     | 0.0592    | 0.0266 | 0.1001 | 0.0392      | 0.0278 | 0.0479 | 0.0341  | 0.0293 | 0.0541 | 0.0438 | 0.0703 |
| SRGS [6] + StableSR [27]  | 0.0500               | 0.0511   | 0.1603 | 0.0271   | 0.0264  | 0.0399 | 0.0792     | 0.0564     | 0.0466    | 0.0369 | 0.0936 | 0.0416      | 0.0359 | 0.0504 | 0.0402  | 0.0402 | 0.0459 | 0.0390 | 0.0567 |
| Ours + StableSR [27]      | 0.0490               | 0.0381   | 0.1272 | 0.0202   | 0.0187  | 0.0314 | 0.0625     | 0.0369     | 0.0422    | 0.0239 | 0.0720 | 0.0315      | 0.0229 | 0.0410 | 0.0309  | 0.0268 | 0.0331 | 0.0279 | 0.0486 |

  

| Method                    | Mip-NeRF 360 [1] |          |         |        |         |         |        |         |        |        |          |
|---------------------------|------------------|----------|---------|--------|---------|---------|--------|---------|--------|--------|----------|
|                           | drjohnson        | playroom | bicycle | bonsai | counter | flowers | garden | kitchen | room   | stump  | treehill |
| 3DGS (LR) [14]            | 0.0613           | 0.0534   | 0.0624  | 0.0659 | 0.0453  | 0.0562  | 0.0452 | 0.0454  | 0.0322 | 0.0586 | 0.0558   |
| 3DGS [14] + StableSR [27] | 0.0499           | 0.0510   | 0.0348  | 0.0320 | 0.0377  | 0.0598  | 0.0170 | 0.0240  | 0.0345 | 0.0536 | 0.0553   |
| Mip-Splatting [33]        | 0.0451           | 0.0345   | 0.0126  | 0.0122 | 0.0166  | 0.0124  | 0.0070 | 0.0046  | 0.0163 | 0.0117 | 0.0252   |
| SRGS [6] + StableSR [27]  | 0.0439           | 0.0378   | 0.0150  | 0.0160 | 0.0226  | 0.0331  | 0.0079 | 0.0066  | 0.0212 | 0.0178 | 0.0345   |
| Ours + StableSR [27]      | 0.0332           | 0.0327   | 0.0151  | 0.0123 | 0.0177  | 0.0380  | 0.0071 | 0.0037  | 0.0144 | 0.0168 | 0.0364   |

Table 13. MUSIQ ↑ on each scene in Tanks & Temples [15], Deep Blending [8], and Mip-NeRF 360 [1].

| Method                    | Tanks & Temples [15] |          |        |          |         |        |            |            |           |        |        |             |        |        |         |        |        |        |        |
|---------------------------|----------------------|----------|--------|----------|---------|--------|------------|------------|-----------|--------|--------|-------------|--------|--------|---------|--------|--------|--------|--------|
|                           | auditorium           | ignatius | palace | ballroom | panther | barn   | lighthouse | playground | courtroom | m60    | temple | caterpillar | family | train  | francis | truck  | church | horse  | museum |
| 3DGS (LR) [14]            | 55.443               | 64.965   | 51.161 | 56.309   | 54.610  | 60.048 | 48.785     | 54.510     | 55.349    | 53.631 | 57.565 | 59.116      | 65.987 | 60.573 | 59.605  | 61.675 | 57.991 | 57.572 | 62.845 |
| 3DGS [14] + StableSR [27] | 58.573               | 58.466   | 49.326 | 56.501   | 57.051  | 60.822 | 46.028     | 53.817     | 55.209    | 54.985 | 54.748 | 60.520      | 62.883 | 60.841 | 55.264  | 60.637 | 55.297 | 54.926 | 62.311 |
| Mip-Splatting [33]        | 51.773               | 48.745   | 42.653 | 50.651   | 46.800  | 49.040 | 33.568     | 41.815     | 45.084    | 47.621 | 46.236 | 51.797      | 49.461 | 51.300 | 40.700  | 47.208 | 47.433 | 39.068 | 53.893 |
| SRGS [6] + StableSR [27]  | 57.276               | 57.690   | 48.339 | 54.321   | 54.969  | 58.305 | 44.228     | 52.796     | 54.435    | 53.662 | 52.762 | 58.732      | 61.687 | 58.721 | 54.220  | 57.781 | 54.378 | 53.369 | 61.291 |
| Ours + StableSR [27]      | 58.504               | 60.078   | 50.762 | 59.501   | 56.915  | 61.660 | 47.882     | 58.036     | 57.351    | 55.500 | 55.978 | 60.757      | 65.967 | 60.214 | 57.281  | 62.616 | 57.574 | 58.244 | 63.491 |

  

| Method                    | Mip-NeRF 360 [1] |          |         |        |         |         |        |         |        |        |          |
|---------------------------|------------------|----------|---------|--------|---------|---------|--------|---------|--------|--------|----------|
|                           | drjohnson        | playroom | bicycle | bonsai | counter | flowers | garden | kitchen | room   | stump  | treehill |
| 3DGS (LR) [14]            | 47.916           | 49.425   | 54.239  | 56.108 | 55.829  | 58.968  | 58.961 | 63.552  | 50.931 | 52.085 | 41.783   |
| 3DGS [14] + StableSR [27] | 52.919           | 53.324   | 55.767  | 59.725 | 57.965  | 52.194  | 54.576 | 59.952  | 58.135 | 44.337 | 38.276   |
| Mip-Splatting [33]        | 38.800           | 44.105   | 38.243  | 44.656 | 42.445  | 35.728  | 44.342 | 50.600  | 41.878 | 35.866 | 35.112   |
| SRGS [6] + StableSR [27]  | 50.849           | 52.035   | 54.818  | 56.237 | 55.391  | 53.542  | 54.318 | 58.321  | 55.637 | 44.039 | 37.260   |
| Ours + StableSR [27]      | 50.594           | 55.444   | 57.923  | 58.501 | 57.752  | 51.206  | 56.236 | 64.952  | 55.154 | 49.551 | 38.014   |

Table 14. NIQE ↓ on each scene in Tanks & Temples [15], Deep Blending [8], and Mip-NeRF 360 [1].

| Method                    | Tanks & Temples [15] |          |        |          |         |       |            |            |           |       |        |             |        |       |         |       |        |       |        |
|---------------------------|----------------------|----------|--------|----------|---------|-------|------------|------------|-----------|-------|--------|-------------|--------|-------|---------|-------|--------|-------|--------|
|                           | auditorium           | ignatius | palace | ballroom | panther | barn  | lighthouse | playground | courtroom | m60   | temple | caterpillar | family | train | francis | truck | church | horse | museum |
| 3DGS (LR) [14]            | 4.718                | 2.628    | 4.293  | 2.791    | 3.884   | 3.944 | 4.097      | 2.744      | 3.385     | 3.625 | 4.081  | 2.873       | 2.605  | 2.994 | 4.269   | 2.784 | 3.169  | 3.011 | 2.926  |
| 3DGS [14] + StableSR [27] | 6.531                | 4.545    | 5.820  | 4.335    | 5.239   | 5.229 | 5.415      | 4.991      | 4.830     | 5.022 | 4.844  | 4.690       | 4.214  | 4.363 | 5.611   | 4.361 | 5.005  | 4.564 | 4.356  |
| Mip-Splatting [33]        | 5.482                | 4.693    | 6.567  | 4.013    | 5.614   | 5.302 | 5.482      | 5.086      | 4.569     | 4.955 | 5.039  | 4.632       | 5.077  | 4.449 | 5.982   | 5.022 | 4.653  | 5.027 | 4.179  |
| SRGS [6] + StableSR [27]  | 6.128                | 4.187    | 5.629  | 3.978    | 4.904   | 4.988 | 5.025      | 4.537      | 4.562     | 4.716 | 4.573  | 4.323       | 4.026  | 4.137 | 5.234   | 4.096 | 4.644  | 4.280 | 4.050  |
| Ours + StableSR [27]      | 5.330                | 3.440    | 4.720  | 3.318    | 3.997   | 4.657 | 4.309      | 3.644      | 4.029     | 3.765 | 4.167  | 3.340       | 3.435  | 3.498 | 4.559   | 3.416 | 3.785  | 3.632 | 3.582  |

  

| Method                    | Mip-NeRF 360 [1] |          |         |        |         |         |        |         |       |       |          |
|---------------------------|------------------|----------|---------|--------|---------|---------|--------|---------|-------|-------|----------|
|                           | drjohnson        | playroom | bicycle | bonsai | counter | flowers | garden | kitchen | room  | stump | treehill |
| 3DGS (LR) [14]            | 4.760            | 5.329    | 2.808   | 3.964  | 3.535   | 2.915   | 2.741  | 2.986   | 4.210 | 3.137 | 2.744    |
| 3DGS [14] + StableSR [27] | 5.231            | 6.225    | 4.333   | 5.452  | 5.533   | 4.938   | 5.516  | 5.633   | 6.013 | 4.919 | 5.105    |
| Mip-Splatting [33]        | 6.097            | 6.426    | 5.665   | 6.458  | 5.730   | 5.965   | 6.155  | 5.600   | 5.885 | 5.623 | 5.462    |
| SRGS [6] + StableSR [27]  | 5.208            | 6.188    | 4.131   | 5.228  | 5.214   | 4.521   | 5.074  | 5.546   | 5.840 | 4.846 | 4.381    |
| Ours + StableSR [27]      | 5.054            | 5.768    | 3.378   | 4.309  | 3.828   | 3.825   | 3.949  | 3.828   | 4.531 | 4.052 | 3.702    |
